# Supplementary material for: Synthesis, structure and characterization of Fe6molecular clusters with peripheral sulfur atom-capped silver nanoparticles
Source: Royal Society of Chemistry journal article supplement (doi:10.1039/c3ce41444b), 2013-10-22
Supplement: c3ce41444b.pdf [file c3ce41444b.pdf]

## Supporting Information

### Synthesis, Structure and Characterization of Fe<sub>6</sub> Molecular Cluster with Peripheral Sulfur Atoms-Capped Silver Nanoparticles

Guomin Jiang, Miao Wang, Xuefang Gu, Tingting Chen, Yanfang Shang, Yanfeng Tang, Guoqing Jiang\* and Yujun Shi

#### Calculation of EF values for BSSC thin films

Surface enhancement factor (EF) of the silver nanoparticles can be calculated using the following equation:<sup>[1]</sup>

$$EF = \frac{N_{bulk} I_{surf}}{N_{surf} I_{bulk}} \quad (1)$$

where  $I_{surf}$  and  $I_{bulk}$  denote the integrated intensities for the strongest band of the Fe<sub>6</sub> adsorbed on the surface silver nanoparticles and the solid Fe<sub>6</sub>, respectively.  $N_{surf}$  and  $N_{bulk}$  represent the numbers of the corresponding surface and solid molecules effectively excited by the laser beam, respectively.

#### Calculation of $N_{bulk}$

The number of Fe<sub>6</sub> molecules excited in the bulk solid,  $N_{bulk}$ , can be calculated as following equation (2):

$$N_{bulk} = \frac{\pi \left( \frac{d_{spot}}{2} \right)^2 D \rho_{Fe6} N_A}{M_{r, Fe6}} \quad (2)$$

where  $d_{spot}$  is the diameter of circular laser spot,  $D$  is the depth of the incident laser beneath the surface of Fe<sub>6</sub> solid,  $\rho_{Fe6}$  and  $M_{r, Fe6}$  are the density and molecular weight of Fe<sub>6</sub>, respectively,  $N_A$  represents the Avogadro constant. In this study, the laser spot was a circle with diameter of ~2 μm, and the depth the laser could reach was about 19 μm, the density (1.528g/cm<sup>3</sup>) and molecular weight (2563.38 g/mol) of solid BT. The calculated value of  $N_{bulk}$  equals to 3.56×10<sup>9</sup>.

#### Calculation of $N_{surf}$

For the Fe<sub>6</sub> molecules adsorbed on the surface of silver nanoparticles, assuming that the Fe<sub>6</sub> molecules are fully adsorbed and adopt a standing-up orientation on Ag surface, then the area occupied by one Fe<sub>6</sub> molecule is considered to be equal to the cross-sectional area of the molecule. The numbers of the Fe<sub>6</sub> molecules effectively excited by the laser beam on the surface of the silver nanoparticles,  $N_{surf}$ , could be calculated as following equation (3):

$$N_{\text{surf}} = \frac{\pi \left( \frac{d_{\text{spot}}}{2} \right)^2}{A_{\text{cs,Fe6}}} \quad (3)$$

where  $d_{\text{spot}}$  has the same definition as equation (2),  $A_{\text{cs,Fe6}}$  is the of the  $\text{Fe}_6$ . The diameter of the  $\text{Fe}_6$  is about 2 nm, so the cross-sectional area is  $\sim 3.14 \text{ nm}^2$ . The calculated value of  $N_{\text{bulk}}$  equals to  $1 \times 10^6$ .

### ASEF calculation

Raman intensity at  $1076 \text{ cm}^{-1}$  was used to calculate the EF. A baseline correction was conducted for EF value calculation at each spectrum. The  $I_{\text{surf}}$  and  $I_{\text{bulk}}$  at  $1076 \text{ cm}^{-1}$  were 5444 and 53. Thus, the EF was calculated to be  $3.65 \times 10^5$ .

### Electrochemical properties of ferric nitrate

A gold disk was polished using alumina slurry (0.5  $\mu\text{m}$  size), washed, degreased and sonicated in water before being used as the working electrode. A standard three-electrode arrangement was used with a platinum auxiliary electrode, an AgCl (10 MM  $\text{AgNO}_3$  in acetonitrile)/Ag reference electrode, and 0.1 M tetrabutylammonium hexafluorophosphate (TBAP) in acetonitrile as supporting electrolyte. Triple distilled water was used for preparing the ferric nitrate solution. Ferric nitrate coverage of the electrode was obtained by using  $0.1 \text{ mol}^{-1}$  ferric nitrate solution dropped in the cleaned Au electrode and then drying in air. Figure S1 is the CV of ferric nitrate on the gold disk electrode in 0.1 M TBAP ( $\text{CH}_3\text{CN}$ ), and the  $\text{Fe}(\text{NO}_3)_3$  has a significant irreversible reduction peak located at ca. -0.83 V.

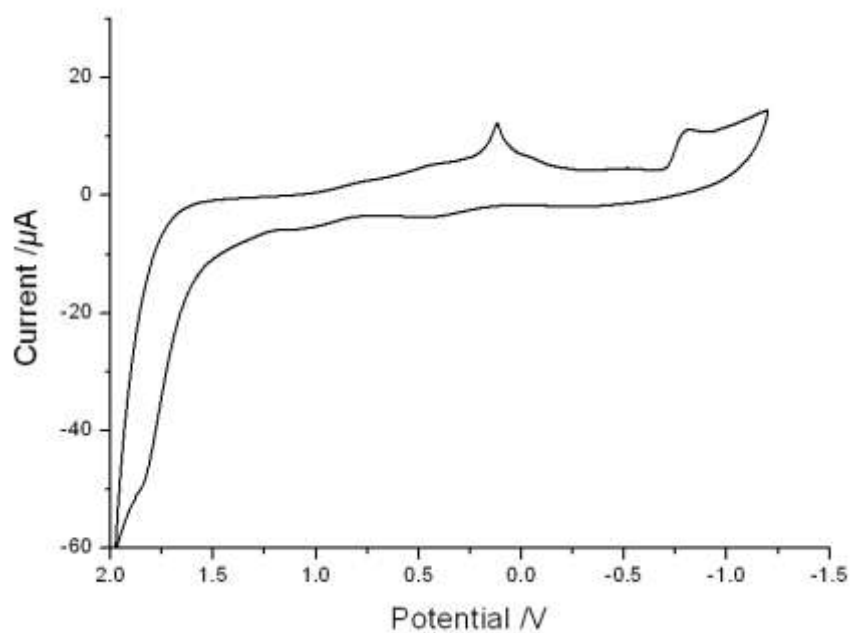

**Figure S1.** Cyclic voltammogram of ferric nitrate in acetonitrile, at room temperature with the scan rate of  $100 \text{ mV s}^{-1}$ .

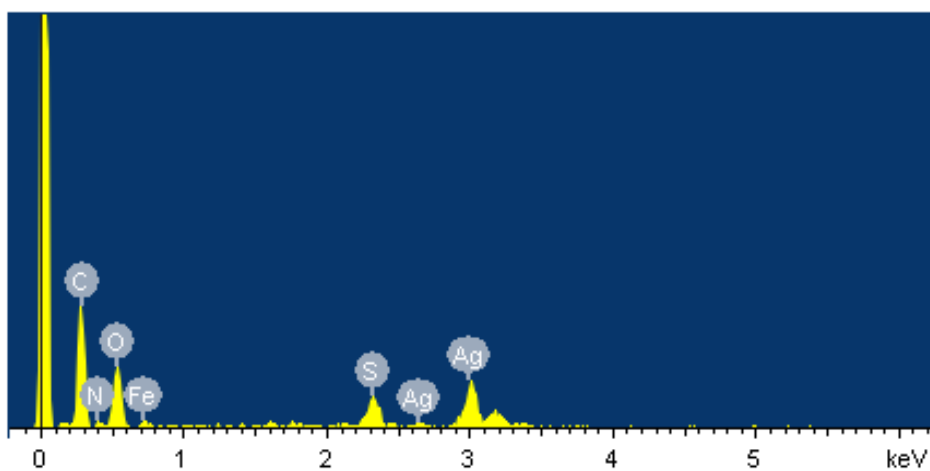

**Fig. S2** X-Ray energy dispersive spectrum from the  $\text{Ag@Fe}_6$ .
